# Supplementary material for: A Health Systems Innovation to Reduce Global Maternal Deaths: Quantitative Systems Modeling of Service Delivery Redesign for Maternal Health
Source: Research Square preprint supplement (doi:10.21203/rs.3.rs-8352244/v1), 2026-01-16
Supplement: Supplementary file 1 [file 10606416c6c287b886ede90e.docx]

**Appendix**

Table S1.Parameter values and data sources for the present model.

| **Parameter** | **Description** | **Value** | **CI** | **Sample size** | **Data sources** |
| --- | --- | --- | --- | --- | --- |
| *Mothers' condition* | | | | | |
| p_highrisk | probability of high-risk pregnancy | 0.260 | (0.247, 0.273) | 4419 | [Bagayoko (2023), Kenya](https://pmc.ncbi.nlm.nih.gov/articles/PMC10619084/pdf/bmjopen-2023-072451.pdf) |
| p_ANC_base | Probability of 4+ ANCs | 0.560 | (0.494, 0.626) | 216 | DHS 2019, Kenya |
| class | Calculated as if above 3 for wealth, education, and has at least a motorbike or car | 0.572 | (0.506, 0.638) | 216 | DHS 2019, Kenya |
| close_to_L23 | Probability of mothers having closest distance to L2/3 facility | 0.890 | (0.886, 0.894) | 19127 | [Croke et al. (2024)](https://doi.org/10.1093/heapol/czae088) |
| *Facility characteristics* | | | | | |
| base_knowledge_L23 | Baseline knowledge of healthcare providers | 0.540 | (0.419, 0.661) | 65 | [Nimako (2020)](https://dash.harvard.edu/handle/1/42676027), Kakamega |
| base_knowledge_L45 | Baseline knowledge of healthcare providers | 0.600 | (0.496, 0.704) | 86 |
| Capacity | Baseline facility capacity of L4/5 per month (unit = # live births) | 2898 | na | na |
| num_L2/3 | Number of L2/3 facilities for redesign | 187 | na | na | Kakamega Base Costing Model provided by Jacaranda Health |
| num_L4 | Number of L4 facilities for redesign | 17 | na | na |
| num_L5 | Number of L5 facilities for redesign | 1 | na | na |
| *ANC phase* | | | | | |
| home_noANC | Probability of home delivery without ANC | 0.706 | na | na | Calculated based on the probability of ANC and the probability of home delivery with ANC according to total probability theory |
| L45_fac | Probability of delivery at L4/5 facility if choosing to deliver at facilities without ANC | 0.110 | na | na | Parameter adjusted in the 1st phase calibration |
| home_lowrisk | Probability of home delivery if predicted as low risk | 0.169 | na | na | Parameter adjusted in the 1st phase calibration |
| L23_highrisk | Probability of delivery at L2/3 facility if predicted as high risk | 0.325 | na | na | Parameter adjusted in the 1st phase calibration |
| sen_risk_trad | Sensitivity of traditional ANC monitoring in predicting high risk | 0.764 | na | na | Parameter adjusted in the 1st phase calibration |
| spec_risk_trad | Specificity of traditional ANC monitoring in predicting low risk | 0.631 | na | na | Parameter adjusted in the 1st phase calibration |
| p_elec_CS|highrisk | Probability of elective CS if predicted as high risk | 0.064 | na | na | Parameter adjusted in the 2nd phase calibration |
| p_elec_CS|preterm_nohighrisk | Probability of elective CS if predicted as preterm but not high-risk | 0.780 | na | na | Parameter adjusted in the 2nd phase calibration |
| p_comp_anemia | Probability of getting anemia | 0.250 | (0.250, 0.250) | 3544672 | [Odhiambo et al. (2020](https://bmcpregnancychildbirth.biomedcentral.com/counter/pdf/10.1186/s12884-020-03380-2.pdf)), Kenya |
| or_anc_anemia | Odds ratio of getting anemia without ANC | 2.260 | (1.05, 4.89) | 353 | [Saapiire et al. (2022](https://pmc.ncbi.nlm.nih.gov/articles/PMC9554427/#:~:text=After%20adjusting%20for%20potential%20confounders,who%20maintained%20adequate%20ANC%20attendance.)), Ghana |
| p_lb_L23to45 | % live births at L4/5 that are incoming maternal referrals | 0.122 | (0.119, 0.125) | 50,981 | [Waiswa et al. (2020), Kenya and Uganda](https://journals.plos.org/plosone/article/file?id=10.1371/journal.pone.0233845&type=printable) |
| OR_preterm_ANC | Odds ratio of preterm birth given adequate ANC | 0.480 | (0.479, 0.481) | 3,006,989 | [Li et ail. (2022)](https://bmcpediatr.biomedcentral.com/articles/10.1186/s12887-022-03591-w), USA |
| GA_distribution | Pooled gestational age distribution from GA = 27 to GA = 44 | (1104, 625, 853, 1269, 1707, 2479, 3584, 5790, 10109, 15665, 23644, 33812, 45770, 40159, 23973, 12425, 6117, 3378) | na | na | [Hazel et al. (2024)](https://pubmed.ncbi.nlm.nih.gov/38228570/), LMICs |
| PT_scale | Scaling factor for adjusting preterm birth rate | 0.825 | na | na | Parameter adjusted in the 1st phase calibration |
| E_Preterm_LMP | Probability of predicting as preterm by LMP if preterm | 0.643 | (0.641, 0.645) | 165908 | [Dietz et al. (2007)](https://doi.org/10.1111/j.1365-3016.2007.00862.x), USA |
| Probability of predicting as preterm by LMP if at-term | 0.039 | (0.038, 0.040) | 165908 |
| Probability of predicting as preterm by LMP if posterm | 0.019 | (0.018, 0.020) | 165908 |
| E_Posterm_LMP | Probability of predicting as posterm by LMP if preterm | 0.030 | (0.029, 0.031) | 165908 |
| Probability of predicting as posterm by LMP if at-term | 0.105 | (0.104, 0.106) | 165908 |
| Probability of predicting as posterm by LMP if posterm | 0.336 | (0.334, 0.338) | 165908 |
| *Intrapartum phase* | | | | | |
| p_aph | Probability of antepartum hemorrhage in facilities | 0.018 | na | na | Parameter adjusted in the 2nd phase calibration |
| p_eclampsia | Probability of eclampsia | 0.016 | na | na | Parameter adjusted in the 2nd phase calibration |
| p_ruptured_uterus | Probability of getting other death-related complications | 0.019 | na | na | Parameter adjusted in the 2nd phase calibration |
| p_cs_capacity_L23 | Probability of emergency C-section (EmCS) if predicted with complications at baseline at L2/3 facilities | 0.057 | na | na | Parameter adjusted in the 2nd phase calibration |
| p_cs_capacity_L45 | Probability of emergency C-section (EmCS) if predicted with complications at baseline at L2/3 facilities | 0.057 | na | na | Parameter adjusted in the 2nd phase calibration |
| p_OL_scale | Scaling factor for adjusting obstructed labor | 0.798 | na | na | Parameter adjusted in the 2nd phase calibration |
| p_pph_other | Probability of postpartum homorrage (PPH) by not OL and not CS, but other risk factors | 0.010 | na | na | Parameter adjusted in the 2nd phase calibration |
| p_mat_sepsis_other | Probability of maternal sepsis by not OL, not CS, but other risk factors | 0.036 | na | na | Parameter adjusted in the 2nd phase calibration |
| spec_comp_trad | Specificity in predicting complications of traditional fetal monitoring | 0.750 | na | na | Assumed it is slightly lower than the worse specificity of intrapartum sensors |
| sen_comp_trad | Sensitivity in predicting complications of traditional fetal monitoring (e.g., stethoscope) | 0.700 | na | na | Assumed it is slightly lower than the worse sensitivity of intrapartum sensors |
| RR_comp_highrisk_vs_lowrisk | Relative risk of complications (including prolonged, obstructed, hypoxia) if high risk compared to low-risk | 4.200 | (1.79, 10.86) | 346 | [Rajbanshi el al. (2020)](https://pmc.ncbi.nlm.nih.gov/articles/PMC7769286/#:~:text=Table%201.,women%20in%20their%20third%20trimester.&text=The%20study%20found%20an%20association,%2C%20p%2Dvalue%20=%200.139.), Nepal, we use the risk ratio of high-risk pregancies having severe maternal morbidity as proxy here |
| p_PL_GA | Probability of prolonged labor by GA = 37 | 0.073 | (0.067, 0.079) | 6168 | [Caughey et al. (2008)](https://pmc.ncbi.nlm.nih.gov/articles/PMC1941614/), USA |
| Probability of prolonged labor by GA = 38 | 0.079 | (0.075, 0.083) | 15773 |
| Probability of prolonged labor by GA = 39 | 0.092 | (0.089, 0.095) | 30685 |
| Probability of prolonged labor by GA = 40 | 0.112 | (0.109, 0.115) | 44722 |
| Probability of prolonged labor by GA = 41 | 0.149 | (0.144, 0.154) | 18638 |
| Probability of prolonged labor by GA = >=42 | 0.197 | (0.183, 0.211) | 3268 |
| p_OL | Probability of obstructed labor if not prolonged | 0.070 | (0.042, 0.098) | 318 | [Girma (2022)](https://www.ncbi.nlm.nih.gov/pmc/articles/PMC9499287/pdf/pone.0275170.pdf), Ethiopia |
| Probability of obstructed labor if prolonged | 0.185 | (0.142, 0.228) | 318 |
| p_hypoxia | Probability of hypoxia | 0.105 | (0.083, 0.127) | 779 | [Elvander (2011)](https://obgyn.onlinelibrary.wiley.com/doi/10.1111/j.1600-0412.2012.01358.x), Sweden |
| p_mat_sepsis_OL | Probability of maternal sepsis by OL | 0.357 | (0.227, 0.474) | na | [Yeshitila (2022)](https://pubmed.ncbi.nlm.nih.gov/36178921/), Ethiopia |
| p_mat_sepsis_elective_CS | Probability of maternal sepsis by elective CS | 0.070 | (0.032, 0.108) | 170 | [Darnal and Dangal (2020)](https://www.jnhrc.com.np/index.php/jnhrc/article/view/2093/928), Nepal |
| p_mat_sepsis_emergency_CS | Probability of maternal sepsis by emergency CS | 0.335 | (0.264, 0.406) | 170 |
| p_pph_OL | Probability of PPH by OL | 0.148 | (0.088, 0.208) | 135 | [Solita (2010), Kakamega](http://erepository.uonbi.ac.ke/handle/11295/25728) |
| p_pph_elective_CS | Probability of PPH by elective CS | 0.064 | (0.027, 0.101) | 170 | [Darnal and Dangal (2020)](https://www.jnhrc.com.np/index.php/jnhrc/article/view/2093/928), Nepal |
| p_pph_emergency_CS | Probability of PPH by emergency CS | 0.188 | (0.129, 0.247) | 170 |
| sen_prolonged_IS | Sensitivity of predicting prolonged labor by intrapartum sensors | 0.740 | (0.65-0.82) | na | [Pan (2022), review](https://pmc.ncbi.nlm.nih.gov/articles/PMC9341104/) |
| spec_prolonged_IS | Specificity of predicting prolonged labor by intrapartum sensors | 0.770 | (0.69-0.84) | na |
| sen_ol_IS | Sensitivity of predicting obstructed labor by intrapartum sensors | 0.870 | (0.817, 0.923) | 154 | [Gilboa, (2014) Israel](https://www.scirp.org/journal/paperinformation?paperid=49683) |
| spec_ol_IS | Specificity of predicting obstructed labor by intrapartum sensors | 0.950 | na | na | Gates Foundation's internal information |
| sen_hypoxia_IS | Sensitivity of predicting hypoxia by intrapartum sensors | 0.774 | (0.739, 0.809) | 552 | [Comert (2019)](https://pmc.ncbi.nlm.nih.gov/articles/PMC6702252/) |
| spec_hypoxia_IS | Specificity of predicting hypoxia by intrapartum sensors | 0.939 | (0.919, 0.959) | 552 |
| CS_AVD_ratio | Proportion of CS among CS and AVD | 0.985 | (0.984, 0.986) | 44031 | Kakamega's facility EMS records |
| Proportion of AVD among CS and AVD | 0.015 | (0.014, 0.016) | 44031 |
| scale_comps | Scaling factor for adjusting maternal complications to Kenya level | 4.480 | na | na | Caculated based on the preterm rate in Kakamega's EMS records and literature value in Kenya |
| or_anemia_pph | Odds ratio of getting PPH given anemia | 3.540 | (1.20, 10.4) | 10561 | [Mansukhani et al. (2023](https://www.sciencedirect.com/science/article/pii/S2214109X23002450?fr=RR-2&ref=pdf_download&rr=8d847e0c5c54c9bf)), LMICs |
| or_anemia_sepsis | Odds ratio of getting sepsis given anemia | 5.680 | (4.38, 7.36) | 2222 | [Melkie et al. (2021](https://archpublichealth.biomedcentral.com/articles/10.1186/s13690-021-00732-y#:~:text=The%20possible%20explanation%20could%20be,might%20leads%20to%20puerperal%20sepsis.)), review |
| or_anemia_eclampsia | Odds ratio of getting eclampsia given anemia | 3.740 | (2.90, 4.81) in nulliparous (2.79, 4.25) in multiparous | 36 | [Kawabata et al. (2022](https://pmc.ncbi.nlm.nih.gov/articles/PMC9792651/#:~:text=Chen%20et%20al.,-3&text=demonstrated%20that%20severe%20anemia%20(Hb,%E2%80%934.25%20in%20multiparous%20women).)), Japan |
| p_comp_severe_lowrisk | Probability of severe complications for low-risk mothers | 0.050 | na | na | Parameter adjusted in the 2nd phase calibration |
| RR_comp_severe_highrisk_vs_lowrisk | Relative risk of severe complications for high-risk mothers compared to low-risk mothers | 4.200 | (1.68, 10.50) | 346 | [Rajbanshi et al. (2020)](https://pmc.ncbi.nlm.nih.gov/articles/PMC7769286/), Nepal |
| *Mortality* | | | | | |
| p_MM_others | Probability of maternal death due to other complications except for aph, pph, eclampsia, obstructed labor, sepsis | 0.005 | na | na | Parameter adjusted in the 3rd phase calibration |
| MM_weight_pph | Weight of pph leading to maternal death | 2.000 | na | na | Parameter adjusted in the 3rd phase calibration |
| MM_weight_sepsis | Weight of sepsis leading to maternal death | 0.476 | na | na | Parameter adjusted in the 3rd phase calibration |
| MM_weight_eclampsia | Weight of elampsia leading to maternal death | 2.000 | na | na | Parameter adjusted in the 3rd phase calibration |
| MM_weight_ol | Weight of obstructed labor leading to maternal death | 0.186 | na | na | Parameter adjusted in the 3rd phase calibration |
| MM_weight_aph | Weight of aph leading to maternal death | 2.000 | na | na | Parameter adjusted in the 3rd phase calibration |
| p_MM_home | Maternal mortality rate due to severe maternal outcome (SMO) by home | 0.146 | na | na | Parameter adjusted in the 3rd phase calibration |
| weight_facility_mat | Weight of facility in calculating MMR as a function of healthcare worker density if getting SMO | 2.666 | na | na | Parameter adjusted in the 3rd phase calibration |
| OR_MM_CSvsSVD | Odds ratio of maternal mortality by CS vs SVD | 2.280 | (1.87-2.79) | 11,628,438 | [Fink et al. (2023)](https://jamanetwork.com/journals/jamanetworkopen/fullarticle/2806478), USA |
| OR_MM_EmCSvsELCS | Odds ratio of maternal mortality by emergency CS vs elective CS | 3.170 | (2.48-4.04) | 11,628,438 | [Fink et al. (2023)](https://jamanetwork.com/journals/jamanetworkopen/fullarticle/2806478), USA |
| OR_MM_transfer | Odds ratio of maternal mortality by transfer | 1.590 | (1.30–1.93) | 15160 | [McIsaac et al. (2017)](https://www.cmaj.ca/content/189/27/e905?), USA |
| *Referral and Transfer* | | | | | |
| t_L23_L45_preterm | Probability of transfer from L2/3 to L4/5 if preterm | 0.809 | na | na | Parameter adjusted in the 2nd phase calibration |
| t_L23_L45_notsevere | Probability of transfer from L2/3 to L4/5 if not severe | 0.742 | na | na | Parameter adjusted in the 2nd phase calibration |
| t_L23_L45_severe | Probability of transfer from L2/3 to L4/5 | 0.900 | na | na | Parameter adjusted in the 2nd phase calibration |
| t_l4_l4_severe | Probability of transfer from L4 to L4 | 0.166 | (0.141, 0.191) | 864 | Kakamega's referral data |
| t_l4_l5_severe | Probability of transfer from L4 to L5 | 0.447 | (0.414, 0.480) | 864 | Kakamega's referral data |
| *Single Interventions - treatments* | | | | | |
| E_MgSO4 | Efficacy of MGSO4 in reducing eclampsia (relative risk) | 0.410 | (0.29, 0.58) | 11444 | [Duley et al. (2010](https://pmc.ncbi.nlm.nih.gov/articles/PMC7061250/)), review |
| E_antibiotics | Efficacy of antibiotics (e.g., azithromycin) in reducing maternal sepsis (relative risk) | 0.670 | (0.56, 0.79) | 14590 | [Ahizechukwu C. Eke et al. (2023), LMICs](https://www.reliasmedia.com/articles/azithromycin-prophylaxis-for-the-prevention-of-maternal-sepsis-or-death-in-women-undergoing-vaginal-delivery?utm_source=chatgpt.com) |
| E_pph_bundle | Efficacy of pph bundle in reducing PPH (relative risk) | 0.510 | (0.44 to 0.60) | na | [Gallos el al. (2023)](https://www.nejm.org/doi/full/10.1056/NEJMoa2303966) |
| E_iv_iron | Efficacy of IV iron infusion in reducing anemia (proportion corrected) | 0.300 | (0.203, 0.397) | 86 | [Cancado et al. (2011)](https://pmc.ncbi.nlm.nih.gov/articles/PMC3459362/#:~:text=The%20average%20increases%20of%20Hb,about%2070%25%20of%20the%20patients.), 70% of anemia can be corrected |
| E_oxytocin | Efficacy of oxytocin, the proportion of prolonged labor can have labor progression (proportion corrected) | 0.910 | (0.827, 0.993) | 46 | [Rouse et al. (1999)](https://journals.lww.com/greenjournal/fulltext/1999/03000/active_phase_labor_arrest__oxytocin_augmentation.1.aspx) |
| S_oxytocin_L45 | Supply level of oxytocin at L4/5 facilities (proportion) | 0.780 | (0.706, 0.854) | 120 | [Kibira et al. (2020)](https://bmjopen.bmj.com/content/11/1/e042948) |
| S_PPH_bundle_L45 | Supply level of pph bundle at L4/5 facilities (proportion) | 0.000 | 0 | 0 | It is innovative multi-component intervention by E-MOTIVE trial ([Williams et al., 2024](https://www.nature.com/articles/s41591-024-03069-5)) |
| S_iv_iron_L45 | Supply level of IV iron at L4/5 facilities (proportion) | 0.440 | na | na | 56% of people in Kenya paid for IV iron out of pocket ([Chhatwal & Ennis, 2022](https://www.re-solveglobalhealth.com/post/discovering-iv-iron-s-untapped-market-in-lmics-drip-by-drip#:~:text=Discovering%20IV%20iron%27s%20untapped%20market,IV%20iron%20out%20of)) |
| S_MgSO4_L45 | Supply level of MgSO4 for reducing eclampsia at L4/5 facilities (proportion) | 0.770 | na | na | [Owolabi et al. (2020), Kenya](https://www.nature.com/articles/s41598-020-72144-x) |
| S_antibiotics_L45 | Supply level of antibiotics for reducing maternal sepsis at L4/5 facilities (proportion) | 0.480 | na | na | [Omulo et al. (2022), Kenya](https://journals.plos.org/plosone/article?id=10.1371%2Fjournal.pone.0270048) |
| *DALY* | | | | | |
| DW_anemia | Disability weight for anemia | 0.052 | (0.0338, 0.0757) | na | [GBD (2021)](https://ghdx.healthdata.org/record/ihme-data/gbd-2021-disability-weights) |
| DW_low_pph | Disability weight for low postpartum hemorrhage | 0.114 | (0.0779, 0.1587) | na | [GBD (2021)](https://ghdx.healthdata.org/record/ihme-data/gbd-2021-disability-weights) |
| DW_high_pph | Disability weight for high postpartum hemorrhage | 0.324 | (0.2197, 0.4418) | na | [GBD (2021)](https://ghdx.healthdata.org/record/ihme-data/gbd-2021-disability-weights) |
| DW_maternal_sepsis | Disability weight for maternal sepsis | 0.133 | (0.0884, 0.1895) | na | [GBD (2021)](https://ghdx.healthdata.org/record/ihme-data/gbd-2021-disability-weights) |
| DW_eclampsia | Disability weight for eclampsia | 0.602 | (0.4266, 0.7527) | na | [GBD (2021)](https://ghdx.healthdata.org/record/ihme-data/gbd-2021-disability-weights) |
| DW_obstructed_labor | Disability weight for obstructed labor | 0.324 | (0.2197, 0.4418) | na | [GBD (2021)](https://ghdx.healthdata.org/record/ihme-data/gbd-2021-disability-weights) |
| DW_maternal_death | Disability weight for maternal death | 1.000 | na | na | [GBD (2021)](https://ghdx.healthdata.org/record/ihme-data/gbd-2021-disability-weights) |
| Mother_life_expectancy | Life expectancy of a mother in Kenya | 69.200 | na | na | [WHO (2025)](https://data.who.int/countries/404) |
| Childbearing_age | Average childbearing age of mothers in Kenya | 28.600 | na | na | [Statista (2025)](https://www.statista.com/statistics/1281232/mean-age-of-childbearing-in-kenya/#:~:text=As%20of%202021%2C%20the%20mean,in%20Kenya%20was%2029%20years.) |
| *Labor force* | | | | | |
| base_surgical | Number of surgical staff in L2/3, L4 and L5 at baseline | (0, 25, 7) | na | na | [Nimako (2020)](https://dash.harvard.edu/handle/1/42676027), Kakamega |
| base_nurse | Number of nurses in L2/3, L4 and L5 at baseline | (1057, 147, 57) | na | na | [Nimako (2020)](https://dash.harvard.edu/handle/1/42676027), Kakamega |
| base_anesthetist | Number of anesthetists in L2/3, L4 and L5 at baseline | (0, 20, 11) | na | na | [Nimako (2020)](https://dash.harvard.edu/handle/1/42676027), Kakamega |
| n_population | Total population in Kakamega County | 1867283 | na | na | [KDHS (2019)](https://www.knbs.or.ke/wp-content/uploads/2023/09/2019-Kenya-population-and-Housing-Census-Analytical-Report-on-Population-Dynamics.pdf), Kenya |
| density_skilled_worker_kenya | Density of skilled healthcare workers in Kenya | 174 | na | na | [Liu and Eggleston (2022)](https://doi.org/10.1007/s11205-022-02910-z) |
| Ave_LBs_thres | Threshold for average monthly number of live births at L4/5 for calculating the number of surgical staff | 167 | na | na | [Stones et al. (2019)](https://obgyn.onlinelibrary.wiley.com/doi/10.1002/ijgo.12815) |
| surgical_needed_below_thres | Number of surgical staff needed if average number of live births at L4 is below threshold | 6.000 | na | na | [Stones et al. (2019)](https://obgyn.onlinelibrary.wiley.com/doi/10.1002/ijgo.12815) |
| surgical_needed_perLB_above_thres | Number of surgical staff needed per live birth if average number of live births at L4 is above threshold | 0.036 | na | na | [Stones et al. (2019)](https://obgyn.onlinelibrary.wiley.com/doi/10.1002/ijgo.12815) |
| nurse_needed_perLB | Number of nurses needed per live birth | 0.185 | na | na | [Nimako (2020)](https://dash.harvard.edu/handle/1/42676027), Kakamega |
| anesthetist_needed_perCS | Number of anesthetists needed per live birth | 0.044 | na | na | [Nimako (2020)](https://dash.harvard.edu/handle/1/42676027), Kakamega |
| surgical_weight | Weight of surgical staff in calculating quality of care | 10.000 | na | na | Used to ensure the density of surgical staff and nurse staff is in the same scale |
| scaled_factor_density | Scaling factor for density of skilled healthcare workers | 6.000 | na | na | Used to ensure the calculated density of healthcare workers match Kenya level |
| *Equipment - intrapartum sensors* | | | | | |
| num_dopplers_L2/3 | Number of dopplers in L2/3 facilities at baseline | 167 | na | na | Kakamega Base Costing Model provided by Jacaranda Health |
| num_dopplers_L4 | Number of dopplers in L4 facilities at baseline | 34 | na | na | Kakamega Base Costing Model provided by Jacaranda Health |
| num_dopplers_L5 | Number of dopplers in L5 facilities at baseline | 2 | na | na | Kakamega Base Costing Model provided by Jacaranda Health |
| num_CTGs_L2/3 | Number of CTG machines in L2/3 facilities at baseline | 0 | na | na | Kakamega Base Costing Model provided by Jacaranda Health |
| num_CTGs_L4 | Number of CTG machines in L4 facilities at baseline | 0 | na | na | Kakamega Base Costing Model provided by Jacaranda Health |
| num_CTGs_L5 | Number of CTG machines in L5 facilities at baseline | 0 | na | na | Kakamega Base Costing Model provided by Jacaranda Health |
| check_time_doppler | Time to check fetal heart rate by doppler in minutes | 10 | na | na | [Stat-technologies (2024)](https://stat-technologies.com/product/summit-doppler-hand-held-doppler/) |
| 1st_stage_time_normal | Duration of 1st stage of labor in minutes for normal delivery - mean and standard deviation | (278, 80) | na | na | [Bhatt et al. (2018)](https://www.ijrcog.org/index.php/ijrcog/article/view/4276) |
| 2nd_stage_time_normal | Duration of 2nd stage of labor in minutes for normal delivery - mean and standard deviation | (37.26, 14) | na | na | [Bhatt et al. (2018)](https://www.ijrcog.org/index.php/ijrcog/article/view/4276) |
| 1st_stage_time_abnormal | Duration of 1st stage of labor in minutes for abnormal labor delivery - mean and standard deviation | (468, 167) | na | na | [Bhatt et al. (2018)](https://www.ijrcog.org/index.php/ijrcog/article/view/4276) |
| 2nd_stage_time_abnormal | Duration of 2nd stage of labor in minutes for abnormal labor delivery - mean and standard deviation | (86, 49) | na | na | [Bhatt et al. (2018)](https://www.ijrcog.org/index.php/ijrcog/article/view/4276) |
| check_interval_1st_stage | Time interval to check fetal heart rate by doppler in minutes during 1st stage of labor | 30 | na | na | [Moldenhauer (2024)](https://www.merckmanuals.com/professional/gynecology-and-obstetrics/labor-and-delivery/fetal-monitoring-during-labor-and-delivery) |
| check_interval_2nd_stage | Time interval to check fetal heart rate by doppler in minutes during 2nd stage of labor | 15 | na | na | [Moldenhauer (2024)](https://www.merckmanuals.com/professional/gynecology-and-obstetrics/labor-and-delivery/fetal-monitoring-during-labor-and-delivery) |
| usage_time_sensor_perday | Time to use doppler/CTG per day in minutes, assuming 20 hours allowing for cleaning and downtime | 1200 | na | na | Assumption |
| *Cost* | | | | | |
| c_USD_to_Ksh | Exchange rate from USD to Ksh | 130 | na | na | [Google Finance (2025)](https://www.google.com/finance/quote/USD-KES?sa=X&sqi=2&ved=2ahUKEwje4oC9yc2LAxWSGVkFHYMbAm4QmY0JegQIHBAu) |
| c_Doppler | Cost per Doppler machine in Ksh | 4000 | na | na | Kakamega Base Costing Model provided by Jacaranda Health |
| c_CTG | Cost per CTG machine in Ksh | 657900 | na | na |
| c_PM_fixed | Fixed cost: program management in Ksh | 40207381 | na | na |
| c_PM_maintain_conservative | Maintenance cost for program management per year in Ksh under conservative scenario | 4556971 | na | na |
| c_PM_maintain_moderate | Maintenance cost for program management per year in Ksh under moderate scenario | 5693559 | na | na |
| c_PM_maintain_aggressive | Maintenance cost for program management per year in Ksh under aggressive scenario | 6833850 | na | na |
| c_overhead_conservative | Overhead cost per year in Ksh under conservative scenario | 5584689 | na | na |
| c_overhead_moderate | Overhead cost per year in Ksh under moderate scenario | 8461217 | na | na |
| c_overhead_aggressive | Overhead cost per year in Ksh under aggressive scenario | 14386851 | na | na |
| c_infra | Infrastructure cost per maternity bed and related infrastructure in Ksh | 2257330 | na | na |
| c_equip_fixed | Equipment fixed cost (excluding dopplers and CTGs) in Ksh | 11359478 | na | na |
| c_taxi_setup | Setup cost for one taxi/boda in Ksh | 19000 | na | na |
| c_taxi_monthly | Monthly cost for one taxi/boda in Ksh | 250 | na | na |
| c_taxi_dispatch | Dispatch cost per dispatch by taxi in Ksh | 5500 | na | na |
| c_ambulance_setup | Setup cost for one ambulance in Ksh | 130500 | na | na |
| c_ambulance_monthly | Monthly cost for one ambulance in Ksh | 2250 | na | na |
| c_ambulance_dispatch | Dispatch cost per dispatch by ambulance in Ksh | 8500 | na | na |
| c_ANC | Cost for four times of ANC visits per patient in Ksh | 312 | na | na |
| c_fac_delivery | Facility normal delivery cost per patient in Ksh | 6148 | na | na |
| c_CS_delivery | C-section delivery cost per patient in Ksh | 29804 | na | na |
| c_surgical_staff | Monthly salary for one surgical staff in Ksh | 9958 | na | na |
| c_nurse_staff | Monthly salary for one nurse staff in Ksh | 4380 | na | na |
| c_anesthetist | Monthly salary for one anesthetist in Ksh | 5098 | na | na |
| dispatches_per_vehicle | Dispatches per vehicle per month | 57 | na | na |
| facilitybirths_per_bed | The number of additional facility births can be supported per maternal bed installed per year | 83 | na | na | [Nimako (2020)](https://dash.harvard.edu/handle/1/42676027), Kakamega |
| inefficiency_index_conservative | The inefficiency index multiplied for overhead and project management cost if having facility overcapacity under conservative scenario | 1.1 | na | na | Assumption |
| inefficiency_index_moderate | The inefficiency index multiplied for overhead and project management cost if having facility overcapacity under moderate scenario | 1.2 | na | na | Assumption |
| inefficiency_index_aggressive | The inefficiency index multiplied for overhead and project management cost if having facility overcapacity under aggressive scenario | 1.3 | na | na | Assumption |
